# Supplementary material for: Phytostabilization of Cd and Pb in Highly Polluted Farmland Soils Using Ramie and Amendments
Source: PubMed Central journal article supplement (PMC7084681; doi:10.3390/ijerph17051661), 2020-03-04
Supplement: ijerph-17-01661-s001.pdf [file ijerph-17-01661-s001.pdf]

## Supporting Information:

**Table 1.** Nutrient elements contents in soil of Dabaoshan(DB) and Yangshuo(YS) mining area (mg kg<sup>-1</sup>).

| Treatment         | P               | Ca                | Fe                | S               | Si               |
|-------------------|-----------------|-------------------|-------------------|-----------------|------------------|
| DBCK              | 1202.76±31.42c  | 1224.31±47.18b    | 58379.22±4112.77a | 1051.22±33.25c  | 72.27±19.67e     |
| DB0.1CB           | 1193.08±3.26c   | 1238.87±34.82b    | 59837.39±607.97a  | 1151.17±18.07b  | 106.85±19.79ef   |
| DB0.5CB           | 1172.40±19.12c  | 1282.57±28.24b    | 58225.44±4662.92a | 1156.43±53.09b  | 99.77±18.72ef    |
| DB0.1CB3.0OF      | 1469.97±133.03b | 1954.37±194.80b   | 58895.23±803.82a  | 1153.63±6.58b   | 131.88±18.55de   |
| DB0.5CB3.0OF      | 1430.58±80.37b  | 1861.07±112.52b   | 60231.49±1134.93a | 1188.48±56.79ab | 139.15±26.33cde  |
| DB0.1CB3.0OF3.0SG | 1672.28±172.44a | 12120.78±7312.32a | 59223.80±2720.82a | 1238.41±65.54a  | 188.05±44.65ab   |
| DB0.5CB3.0OF3.0SG | 1774.21±97.86a  | 14440.16±5794.54a | 58262.15±2174.50a | 1254.47±42.00a  | 206.59±46.05a    |
| YSCK              | 634.27±17.08e   | 1224.31±47.18b    | 23814.94±554.37b  | 1182.91±33.70f  | 156.68±41.17ef   |
| YS0.1CB           | 688.61±79.38e   | 1238.87±34.82b    | 23923.08±698.01b  | 1131.77±45.61f  | 92.69±39.77f     |
| YS0.5CB           | 631.25±38.46e   | 1282.57±28.24b    | 23669.61±887.38b  | 1100.44±87.05f  | 169.98±84.63bcde |
| YS0.1CB3.0OF      | 886.21±54.38d   | 1954.37±194.80b   | 23835.7±547.78b   | 1249.64±85.28d  | 160.65±73.95abcd |
| YS0.5CB3.0OF      | 888.68±15.53d   | 1861.07±112.52b   | 23196.18±355.32b  | 1188.48±56.79d  | 124.79±31.55abc  |

**Table S1.** Nutrient element contents in soil of Dabaoshan (DB) and Yangshuo (YS) mining areas (mg kg<sup>-1</sup>). All data presented are means ± SD (standard deviation) of independent replicates. Values in the graph are mean ( $n = 3$ ). Means of significant difference are statistically analyzed by t test or Duncan's multiple range tests at  $P < 0.05$ .

**Table 2.** Nutrient elements contents in shoots of ramie (mg kg<sup>-1</sup>).

| Treatment         | P                   | Ca                  | Fe                 | S                | Si             |
|-------------------|---------------------|---------------------|--------------------|------------------|----------------|
| DBCK              | 835.31±87.69f       | 6628.83±1603.73e    | 4976.29±1153.63def | 1062.35±238.57bc | 107.05±8.67e   |
| DB0.1CB           | 886.52±42.09ef      | 9510.12±586.40bcde  | 6310.02±1000.79de  | 1448.81±175.37bc | 111.67±1.98de  |
| DB0.5CB           | 970.16±133.47def    | 9470.82±1451.56bcde | 6688.43±686.01cd   | 1278.19±137.41bc | 115.96±6.11cde |
| DB0.1CB3.0OF      | 1032.82±56.82cdef   | 10614.34±1067.41bcd | 7222.11±706.65bcd  | 1511.75±588.43bc | 117.53±0.85cde |
| cdeDB0.5CB3.0OF   | 1052.52±97.24cdef   | 11558.65±969.32b    | 8913.41±800.63abc  | 1814.85±379.82b  | 119.08±7.52cde |
| DB0.1CB3.0OF3.0SG | 1338.08±230.94bcdef | 15499.57±3054.24a   | 9019.71±1635.65ab  | 3670.64±682.80a  | 139.84±6.68ab  |
| DB0.5CB3.0OF3.0SG | 1461.01±504.68bcd   | 15578.85±3927.24a   | 10635.48±1597.11a  | 3388.94±942.46a  | 143.60±10.52a  |
| YSCK              | 1375.64±0.63bcde    | 7400.26±385.32de    | 2984.48±220.10f    | 792.35±74.23c    | 86.55±6.47f    |
| YS0.1CB           | 1554.30±190.93bc    | 8276.97±1043.97cde  | 3806.20±1080.33f   | 880.88±42.36c    | 104.15±9.86e   |
| YS0.5CB           | 1665.17±148.66b     | 9096.95±736.68bcde  | 4352.72±972.94ef   | 882.58±52.68c    | 106.58±7.58e   |
| YS0.1CB3.0OF      | 2156.73±389.44a     | 11406.95±1039.28bc  | 6996.59±1986.72bcd | 1155.68±116.68bc | 124.68±14.14cd |
| YS0.5CB3.0OF      | 2244.47±597.78a     | 12316.99±642.22b    | 7037.29±1534.71bcd | 1223.26±19.22bc  | 128.38±8.56bc  |

**Table S2.** Nutrient element contents in shoots of ramie. All data presented are means ± SD (standard deviation) of independent replicates. Values in the graph are mean ( $n = 3$ ). Means of significant difference are statistically analyzed by t test or Duncan's multiple range tests at  $P < 0.05$ .

**Table 3.** Nutrient elements contents in roots of ramie (mg kg<sup>-1</sup>).

| Treatment | P              | Ca                 | Fe                 | S                | Si            |
|-----------|----------------|--------------------|--------------------|------------------|---------------|
| DBCK      | 835.31±87.69f  | 6628.83±1603.73e   | 4976.29±1153.63def | 1062.35±238.57bc | 107.05±8.67e  |
| DB0.1CB   | 886.52±42.09ef | 9510.12±586.40bcde | 6310.02±1000.79de  | 1448.81±175.37bc | 111.67±1.98de |

|                   |                     |                     |                    |                  |                |
|-------------------|---------------------|---------------------|--------------------|------------------|----------------|
| DB0.5CB           | 970.16±133.47def    | 9470.82±1451.56bcde | 6688.43±686.01cd   | 1278.19±137.41bc | 115.96±6.11cde |
| DB0.1CB3.0OF      | 1032.82±56.82cdef   | 10614.34±1067.41bcd | 7222.11±706.65cde  | 1511.75±588.43bc | 117.53±0.85cde |
| DB0.5CB3.0OF      | 1052.51±97.24cdef   | 11558.65±969.32b    | 8913.41±800.63abc  | 1814.85±379.82b  | 119.08±7.52cde |
| DB0.1CB3.0OF3.0SG | 1338.08±230.94bcdef | 15499.57±3054.24a   | 9019.71±1635.65ab  | 3670.64±682.80a  | 139.84±6.68ab  |
| DB0.5CB3.0OF3.0SG | 1461.01±504.68bcd   | 15578.85±3927.31a   | 10635.48±1597.11a  | 3388.94±942.46a  | 143.60±10.52a  |
| YSCK              | 1375.64±0.63bcde    | 7400.26±385.32de    | 2984.48±220.10f    | 792.35±74.23c    | 86.55±6.47f    |
| YS0.1CB           | 1554.30±190.93bc    | 8276.97±1043.97cde  | 3806.20±1080.33f   | 880.88±42.36c    | 104.15±9.86e   |
| YS0.5CB           | 1665.17±148.66b     | 9096.95±736.68bcde  | 4352.72±972.94ef   | 882.58±52.68c    | 106.58±7.58e   |
| YS0.1CB3.0OF      | 2156.73±389.44a     | 11406.95±736.68bc   | 6996.59±1986.72cde | 1155.68±116.68bc | 124.68±14.14cd |
| YS0.5CB3.0OF      | 2244.47±597.78a     | 12316.99±642.22b    | 7037.29±1534.71cde | 1223.26±19.22bc  | 128.38±8.56bc  |

**Table S3.** Nutrient element contents in shoots of ramie. All data presented are means ± SD (standard deviation) of independent replicates. Values in the graph are mean ( $n = 3$ ). Means of significant difference are statistically analyzed by t test or Duncan's multiple range tests at  $P < 0.05$ .
